# Supplementary material for: Natural rubber latex assisted shape-attuned synthesis of intrinsically radiopaque and magnetic bioceramic nanocomposite with hyperthermia potential for cancer therapeutics
Source: Royal Society of Chemistry journal article supplement (doi:10.1039/d1nj01262b), 2021-01-01
Supplement: d1nj01262b1.pdf [file d1nj01262b1.pdf]

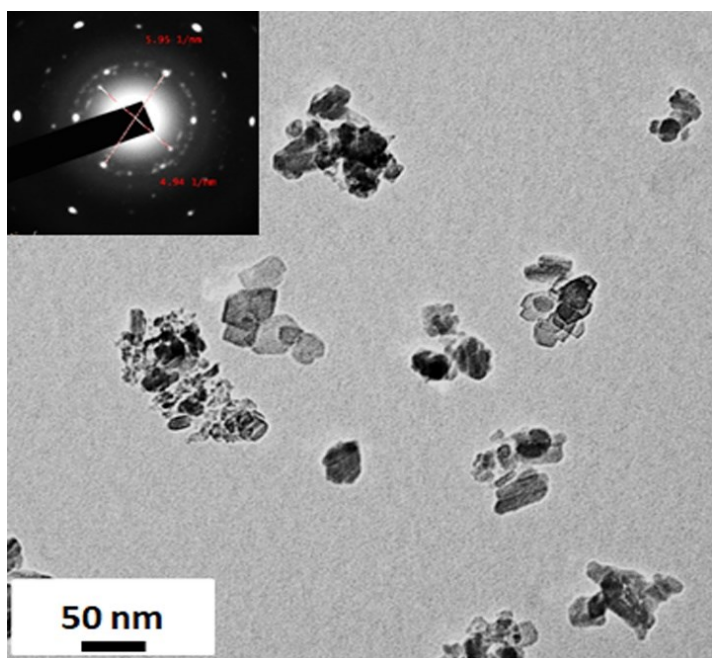

Figure S1: TEM microstructure of MN (SEAD pattern in the inset)

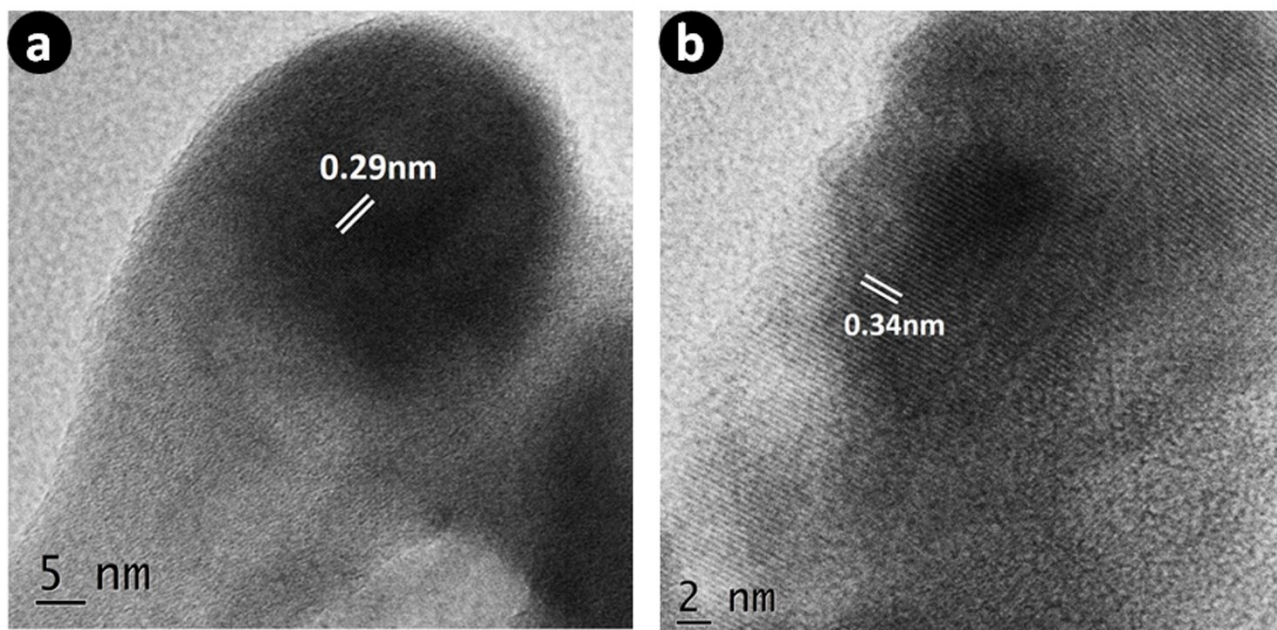

Figure S2: HR-TEM images of LMN6 (a and b)

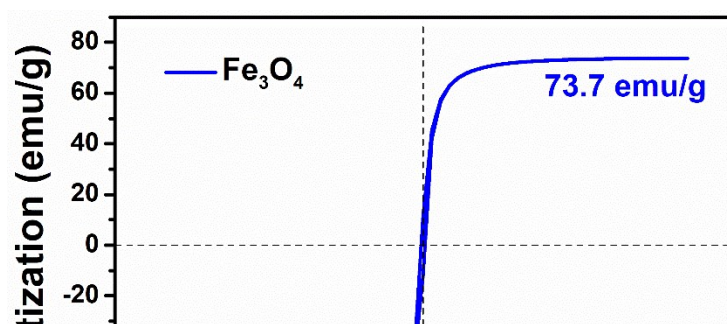

Figure S3: VSM curve of  $\text{Fe}_3\text{O}_4$

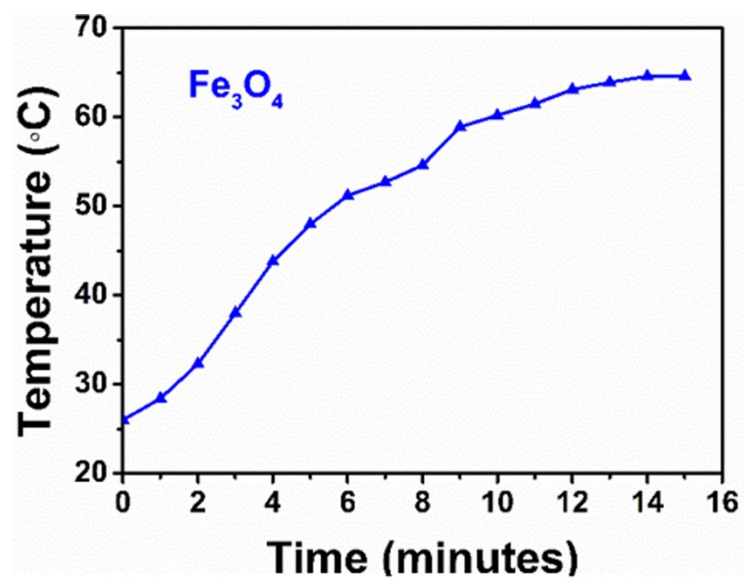

Figure S4: Time-temperature heating profile of  $\text{Fe}_3\text{O}_4$

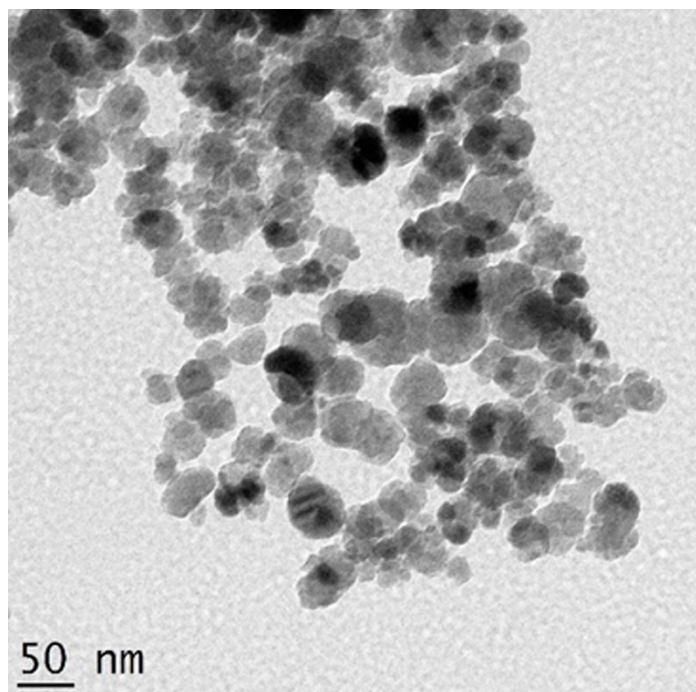

Figure S5: TEM microstructure of  $\text{Fe}_3\text{O}_4$  nanoparticles
